# Supplementary figures and images for: DR-Integrator: a new analytic tool for integrating DNA copy number and gene expression data
Source: PubMed Central journal article supplement — Bioinformatics. 2009 Dec 22;26(3):414–6. doi: 10.1093/bioinformatics/btp702 (PMC2815664; doi:10.1093/bioinformatics/btp702), 2009-12-22

# Figure 1

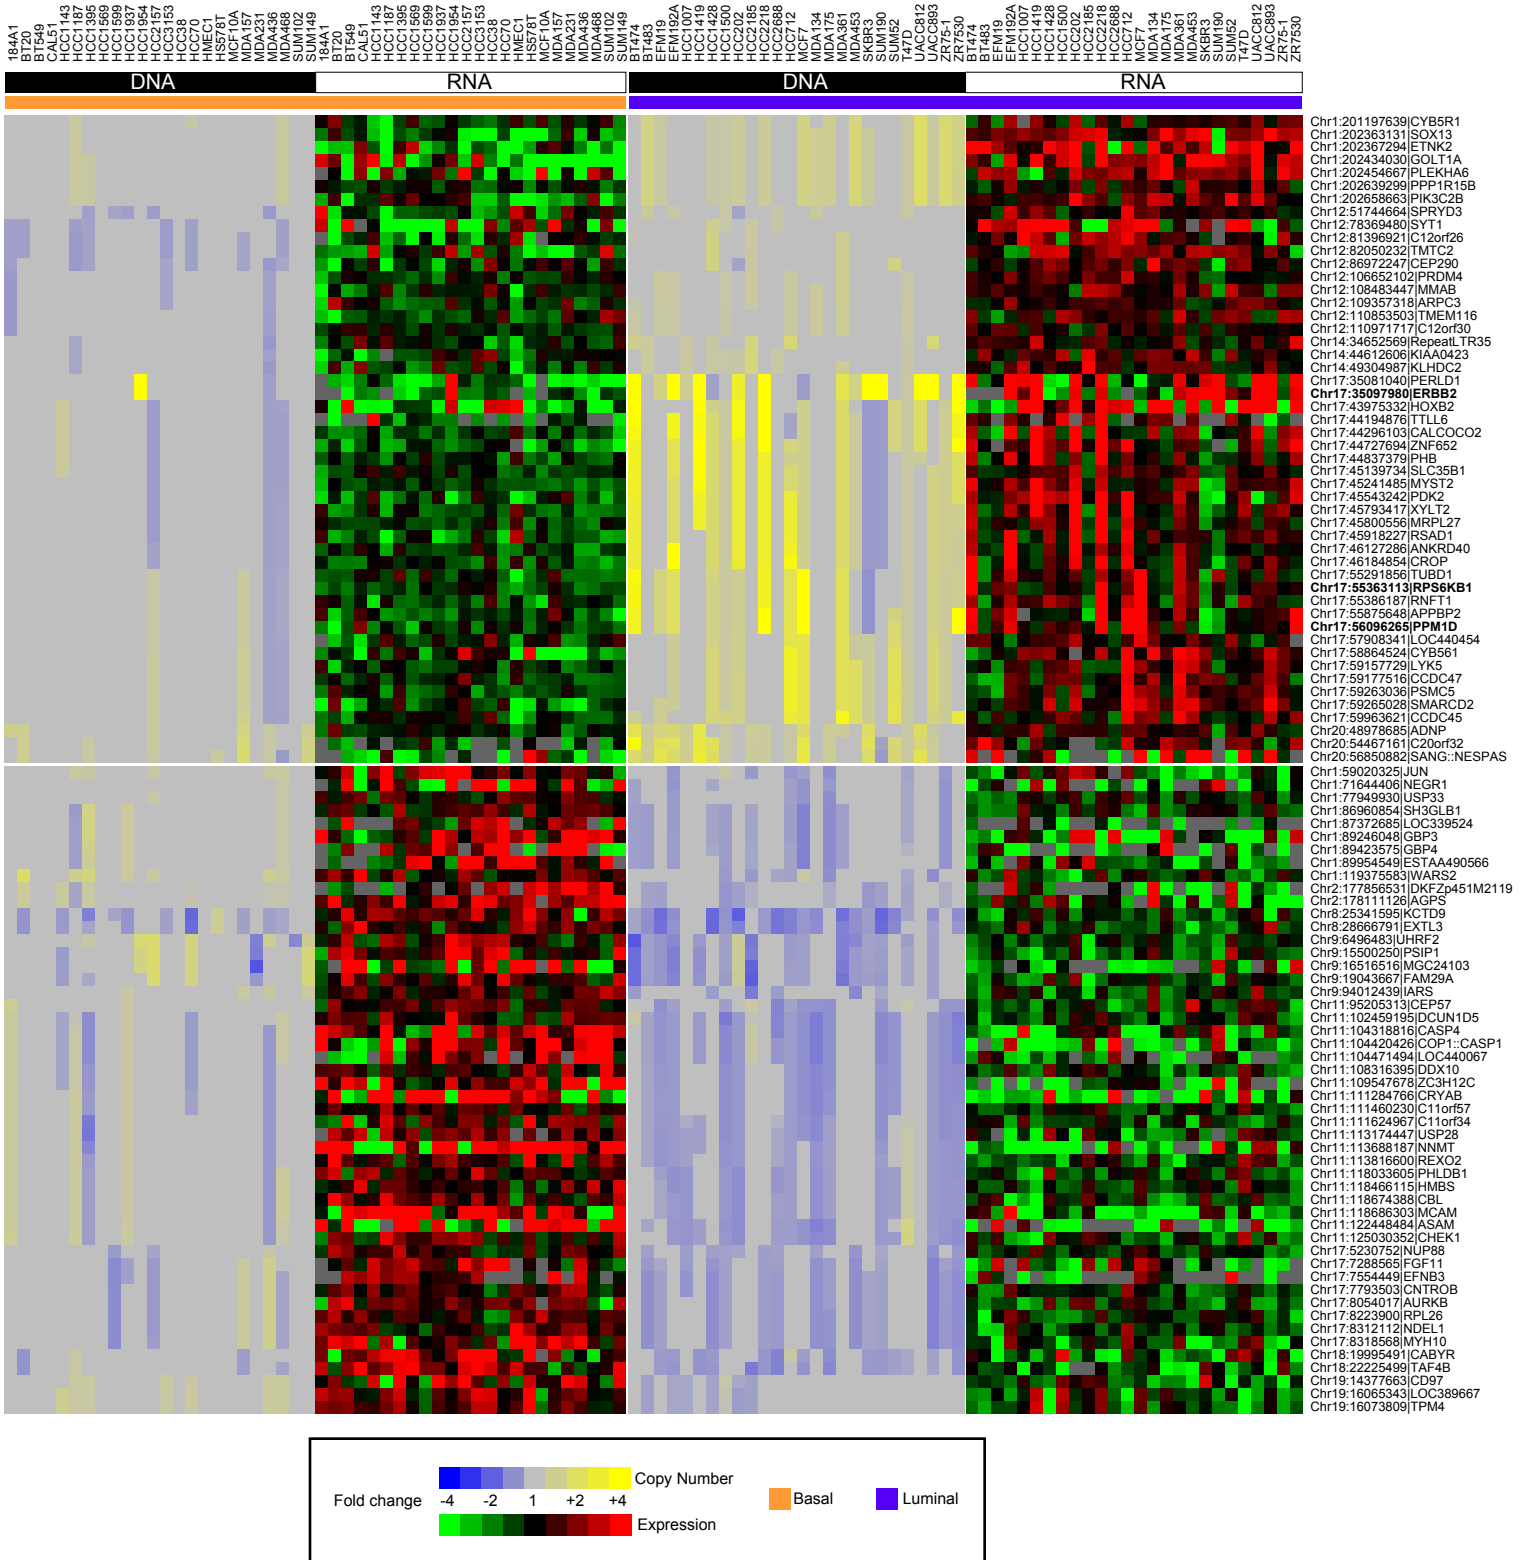

Supplement: btp702_1.pdf [file btp702_1.pdf]
